# Supplementary material
Source: PubMed Central journal article supplement (PMC1166617)

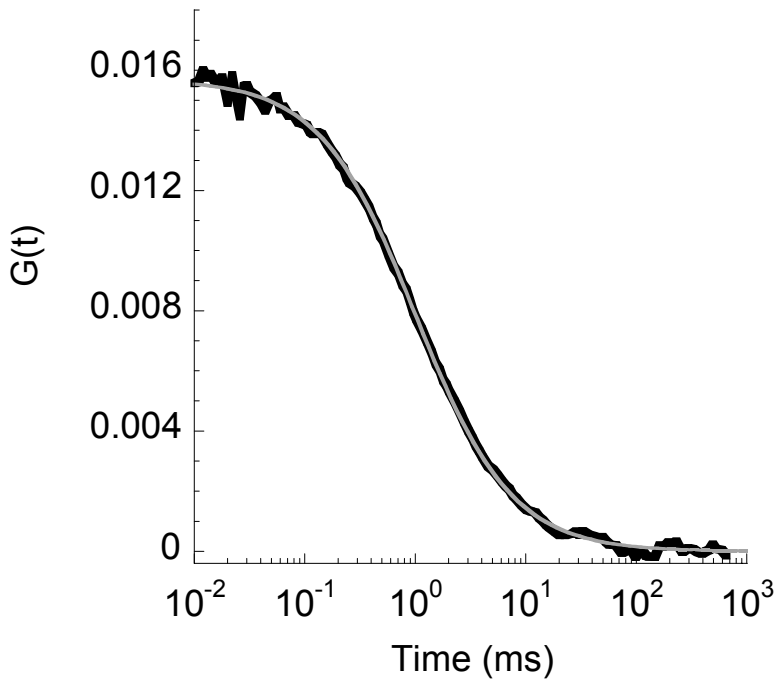

Supplement: pnas_0503311102_1.pdf [file pnas_0503311102_1.pdf]

A

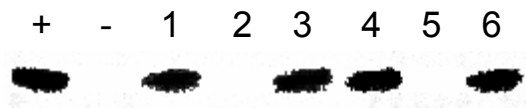

B

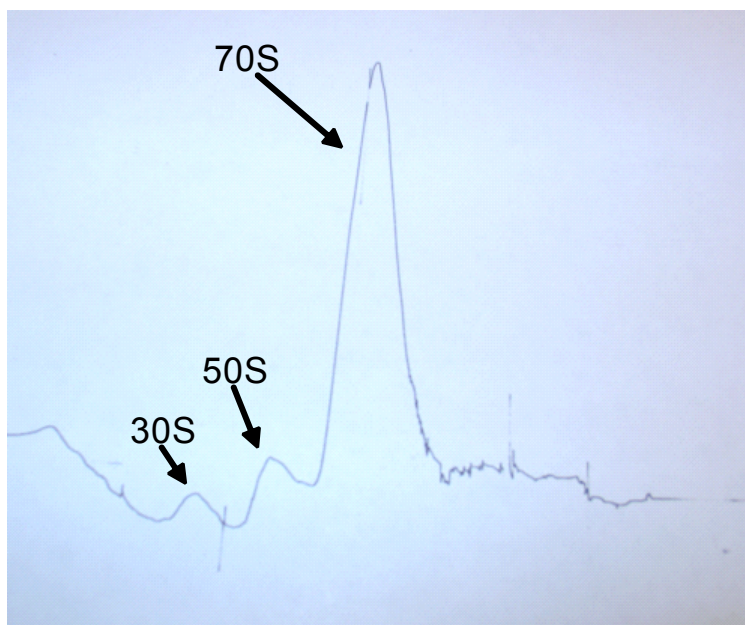

Supplement: pnas_0503311102_2.pdf [file pnas_0503311102_2.pdf]

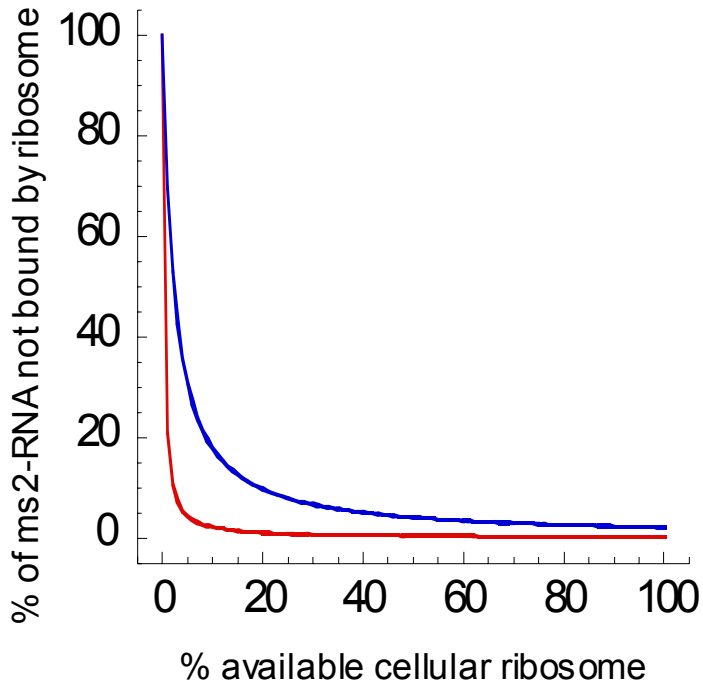

Supplement: pnas_0503311102_3.pdf [file pnas_0503311102_3.pdf]

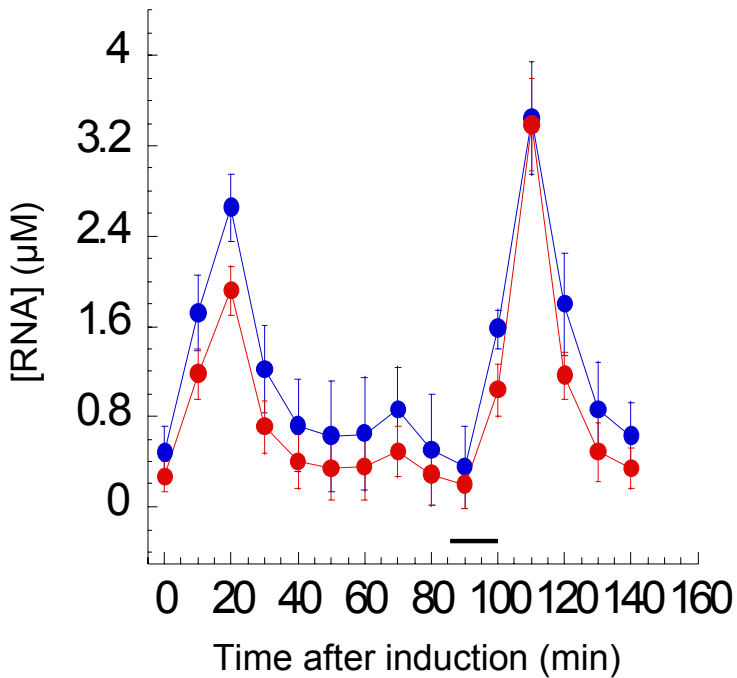

Supplement: pnas_0503311102_4.pdf [file pnas_0503311102_4.pdf]

A

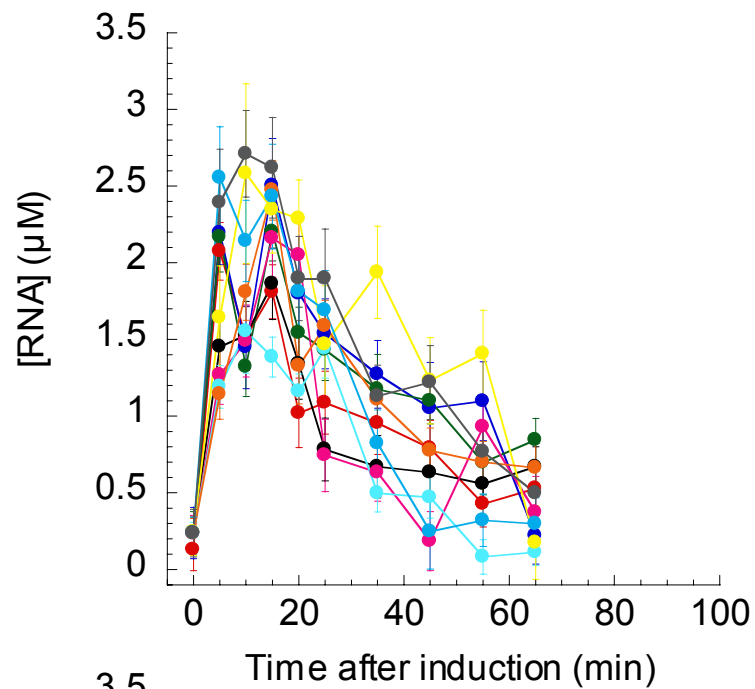

B

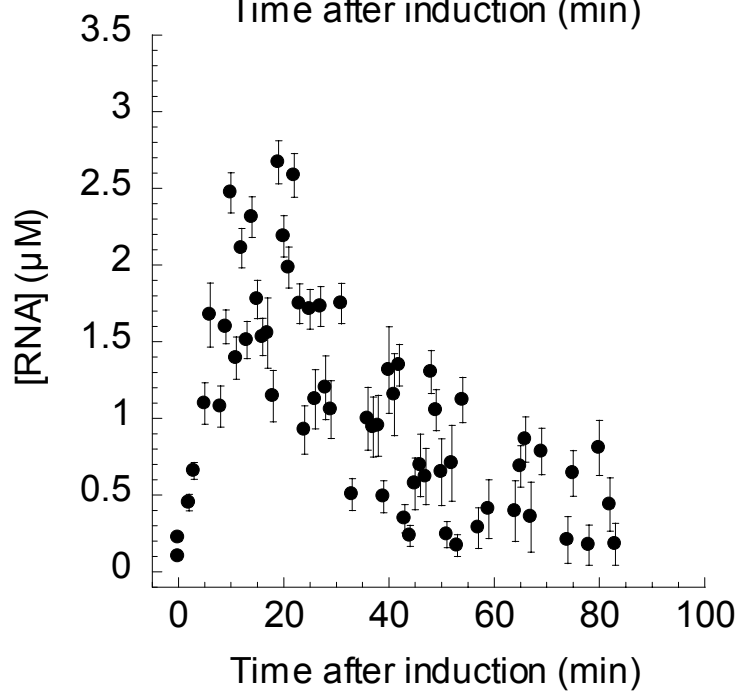

C

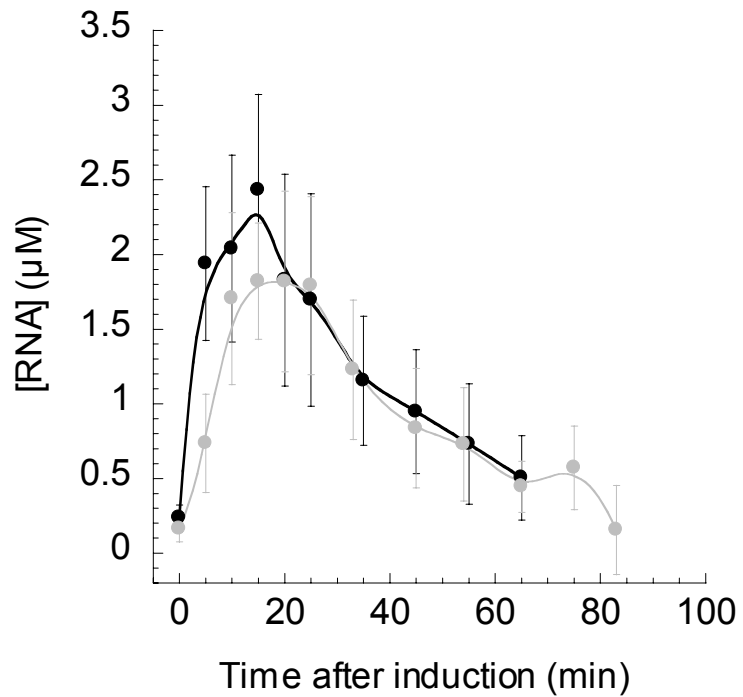

Supplement: pnas_0503311102_5.pdf [file pnas_0503311102_5.pdf]

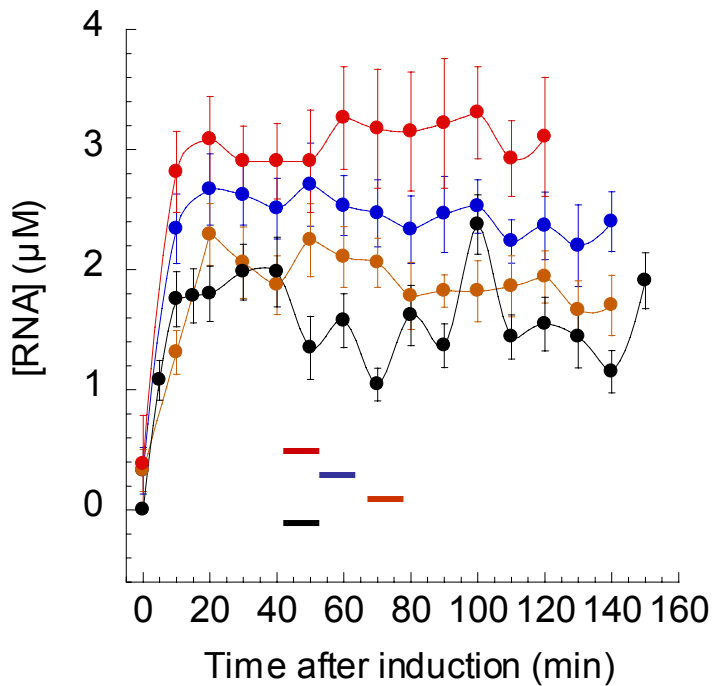

Supplement: pnas_0503311102_6.pdf [file pnas_0503311102_6.pdf]
